# Supplementary material
Source: Copernicus journal article supplement (doi:10.5194/os-22-1483-2026)
Supplement: Supplementary file 1 [file os-22-1483-2026-supplement.pdf]

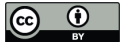

*Supplement of*

## **Climatology and annual cycle of global ocean dissolved oxygen represented by multiple observational gridded products**

**Juan Du et al.**

*Correspondence to:* Juan Du ([dujuan10@mail.iap.ac.cn](mailto:dujuan10@mail.iap.ac.cn))

The copyright of individual parts of the supplement might differ from the article licence.

1 **Contents of this file**

2 Supplementary Figures:

3 **Figure S1:** Common land-ocean mask for the depth layers of 1000 m, 3000 m, 4000  
4 m and 5000 m.

5 **Figure S2:** Global zonal mean O<sub>2</sub> concentration and differences for 0-600 m (a, c)  
6 and 0-2000 m (b, d) (unit:  $\mu\text{mol kg}^{-1}$ ).

7 **Figure S3:** The spatial patterns of the upper 300m climatological mean O<sub>2</sub>  
8 concentration (unit:  $\mu\text{mol kg}^{-1}$ ). (a) WOA23, (b) WOA23-IAP, (c) WOA18, (d)  
9 WOA18-IAP, (e) GOBAI, (f) GOBAI-IAP, (g) RB, (h) RB-IAP, (i) GLODAP, (j)  
10 GLODAP-IAP, (k) SJTU, (l) SJTU-IAP, (m) IAP, (n) Spread is calculated as the  
11 difference of the upper 300m climatological mean O<sub>2</sub> among the datasets.

12 **Figure S4:** Zonal mean annual cycles of temperature for 0-100 m (a) and 100-600 m  
13 (b) for IAP temperature data product (unit: °C).

14 **Figure S5:** Zonal mean annual cycles of Pacific Ocean for 0-100 m (upper) and  
15 100-600 m (lower) for different data products (unit:  $\mu\text{mol kg}^{-1}$ ).

16 **Figure S6:** Zonal mean annual cycles of Atlantic Ocean for 0-100 m (upper) and  
17 100-600 m (lower) for different data products (unit:  $\mu\text{mol kg}^{-1}$ ).

18 **Figure S7:** Zonal mean annual cycles of Indian Ocean for 0-100 m (upper) and  
19 100-600 m (lower) for different data products (unit:  $\mu\text{mol kg}^{-1}$ ).

20 **Figure S8:** Annual variation for the Pacific Ocean of the (a) 0-100 m and (b) 100-600  
21 m mean O<sub>2</sub> for IAP, WOA23, WOA18, and GOBAI datasets (unit:  $\mu\text{mol kg}^{-1}$ ).

22 **Figure S9:** Annual variation for the Atlantic Ocean of the (a) 0-100 m and (b)  
23 100-600 m mean O<sub>2</sub> for IAP, WOA23, WOA18, and GOBAI datasets (unit:  $\mu\text{mol}$   
24  $\text{kg}^{-1}$ ).

25 **Figure S10:** Annual variation for the Indian Ocean of the (a) 0-100 m and (b)  
26 100-600 m mean O<sub>2</sub> for IAP, WOA23, WOA18, and GOBAI datasets (unit:  $\mu\text{mol}$   
27  $\text{kg}^{-1}$ ).

28 **Figure S11:** Annual variation of the (a) North Pacific and (b) South Pacific mean O<sub>2</sub>  
29 for IAP, WOA23, WOA18, and GOBAI datasets (unit:  $\mu\text{mol kg}^{-1}$ ).

30 **Figure S12** Annual variation of the (a) North Atlantic and (b) South Atlantic mean O<sub>2</sub>  
31 for IAP, WOA23, WOA18, and GOBAI datasets (unit:  $\mu\text{mol kg}^{-1}$ ).

32

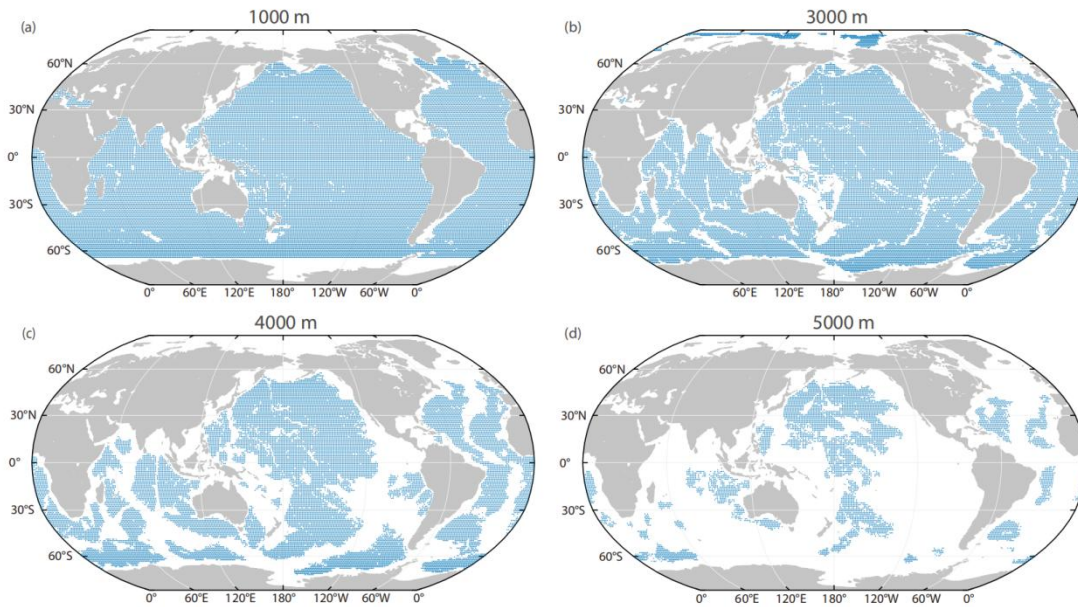

33  
34  
35  
36

**Figure S1** Common land-ocean mask for the depth layers of 1000 m, 3000 m, 4000 m and 5000 m.

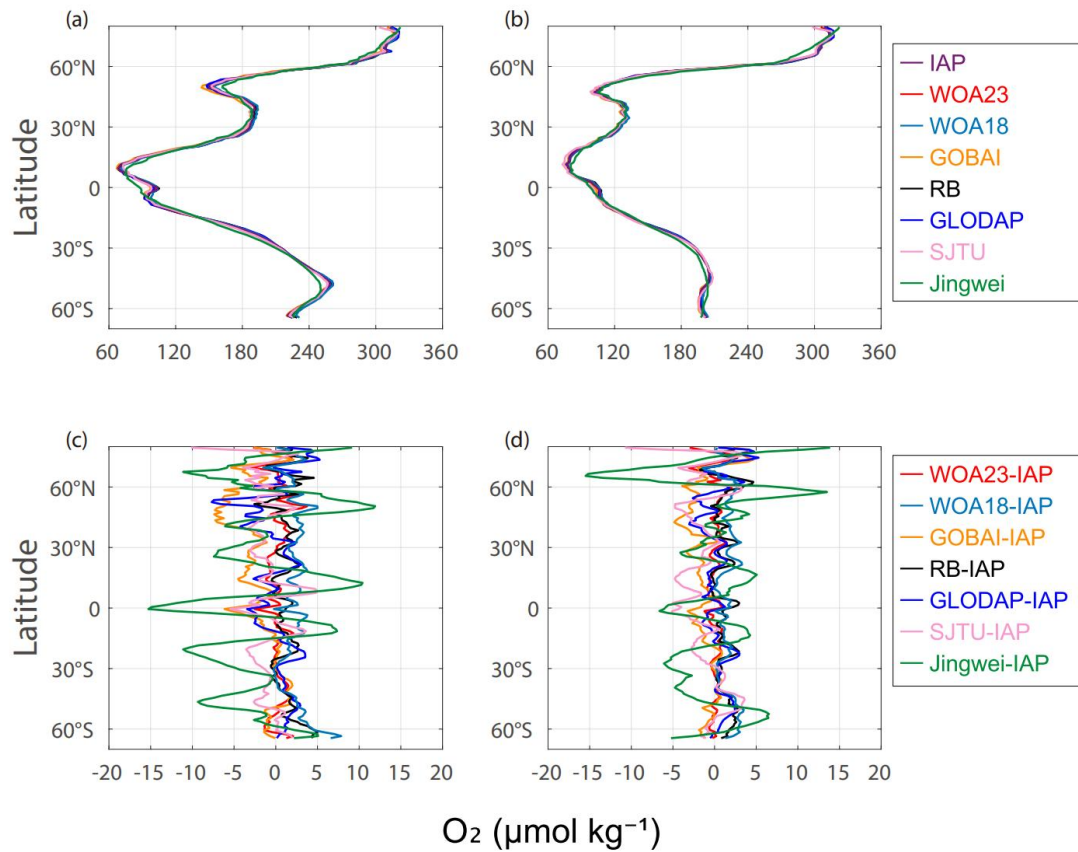

37  
38  
39  
40

**Figure S2** Global zonal mean  $O_2$  concentration and differences for 0-600 m (a, c) and 0-2000 m (b, d) (unit:  $\mu\text{mol kg}^{-1}$ ).

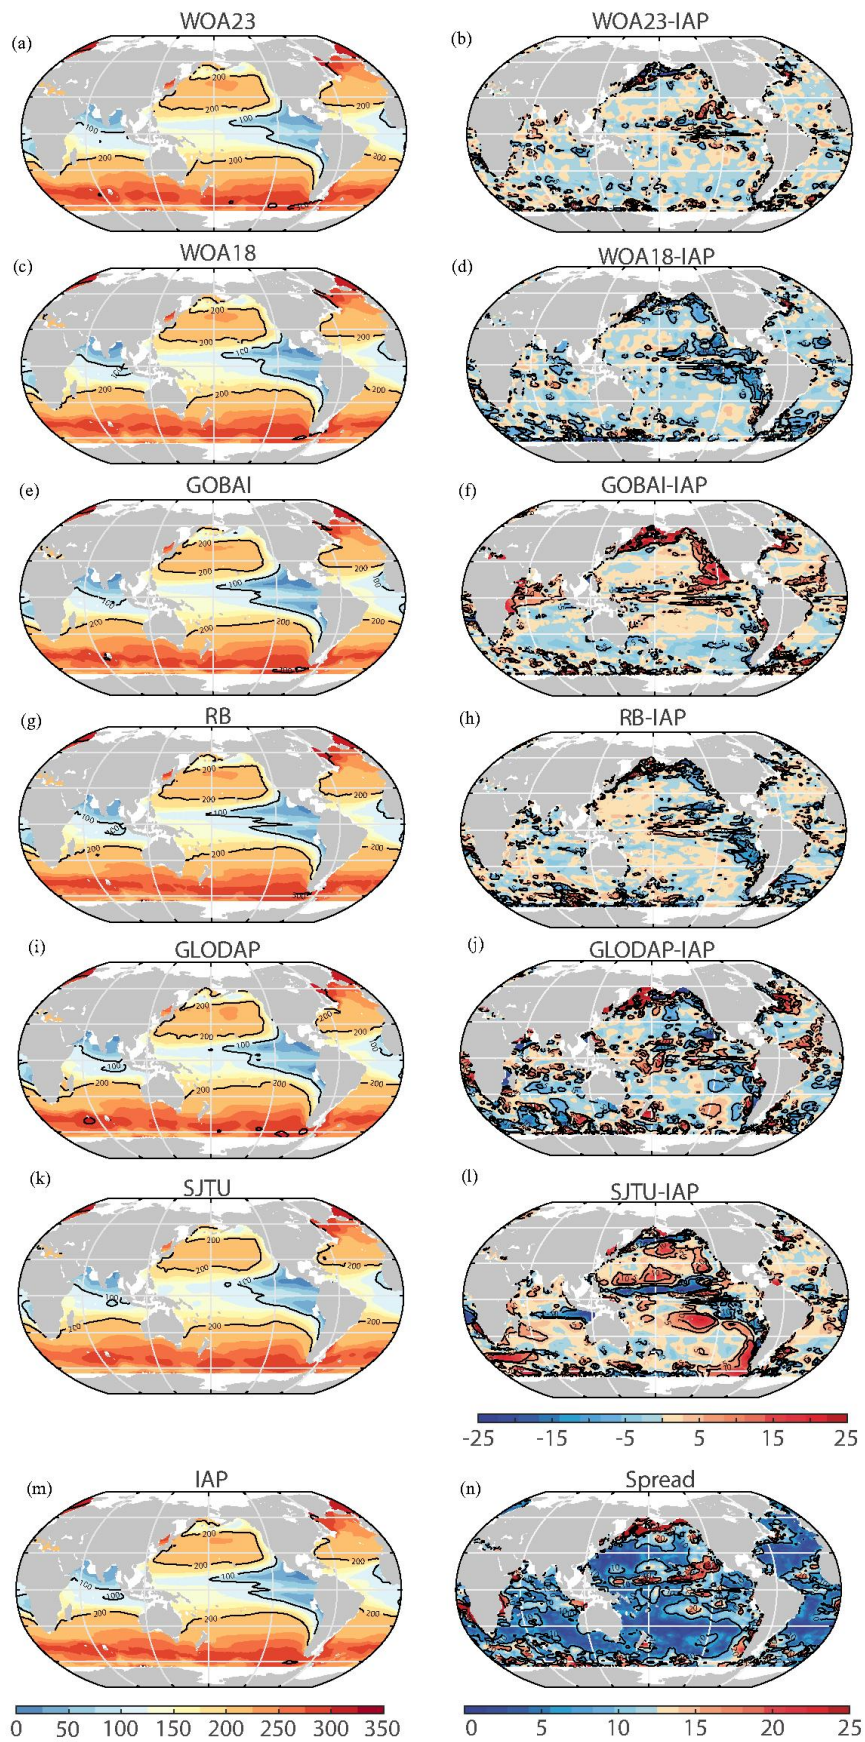

$O_2$  ( $\mu\text{mol kg}^{-1}$ )

42 **Figure S3** The spatial patterns of the upper 300m climatological mean O<sub>2</sub>  
 43 concentration (unit:  $\mu\text{mol kg}^{-1}$ ). (a) WOA23, (b) WOA23-IAP, (c) WOA18, (d)  
 44 WOA18-IAP, (e) GOBAI, (f) GOBAI-IAP, (g) RB, (h) RB-IAP, (i) GLODAP, (j)  
 45 GLODAP-IAP, (k) SJTU, (l) SJTU-IAP, (m) IAP, (n) Spread is calculated as the  
 46 difference of the upper 300m climatological mean O<sub>2</sub> among the datasets.  
 47

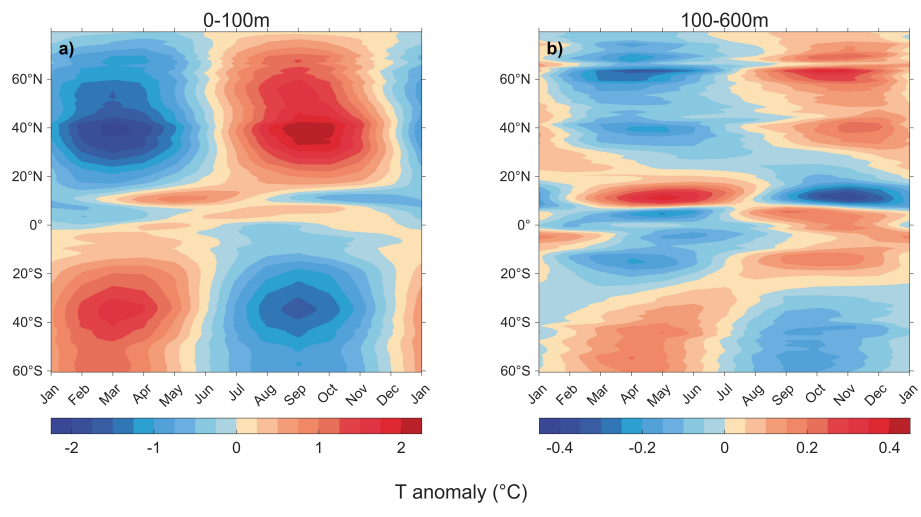

48  
 49 **Figure S4** Zonal mean annual cycles of temperature for 0-100 m (a) and 100-600 m  
 50 (b) for IAP temperature data product (unit:°C).  
 51

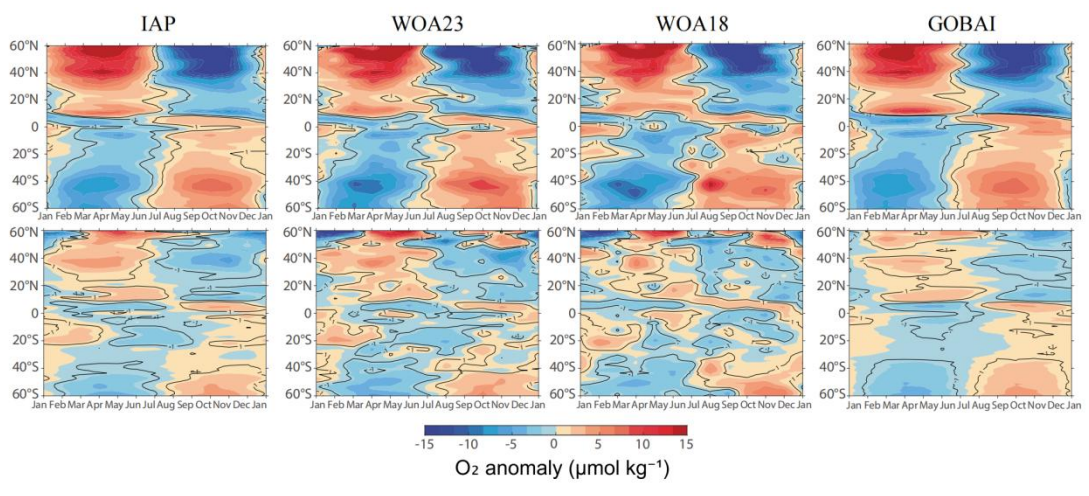

52  
 53 **Figure S5** Zonal mean annual cycles of Pacific Ocean for 0-100 m (upper) and  
 54 100-600 m (lower) for different data products (unit:  $\mu\text{mol kg}^{-1}$ ).  
 55

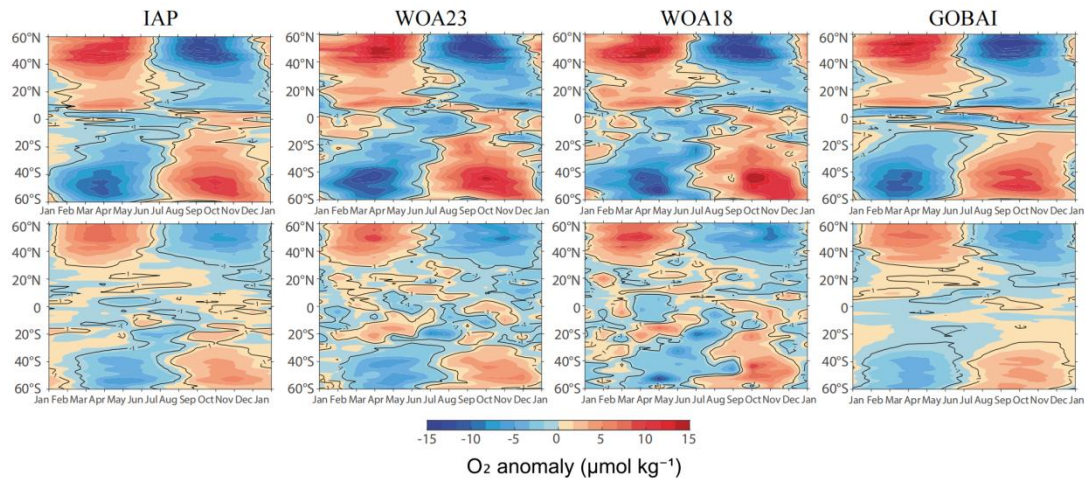

56  
57  
58  
59

**Figure S6** Zonal mean annual cycles of Atlantic Ocean for 0-100 m (upper) and 100-600 m (lower) for different data products (unit:  $\mu\text{mol kg}^{-1}$ ).

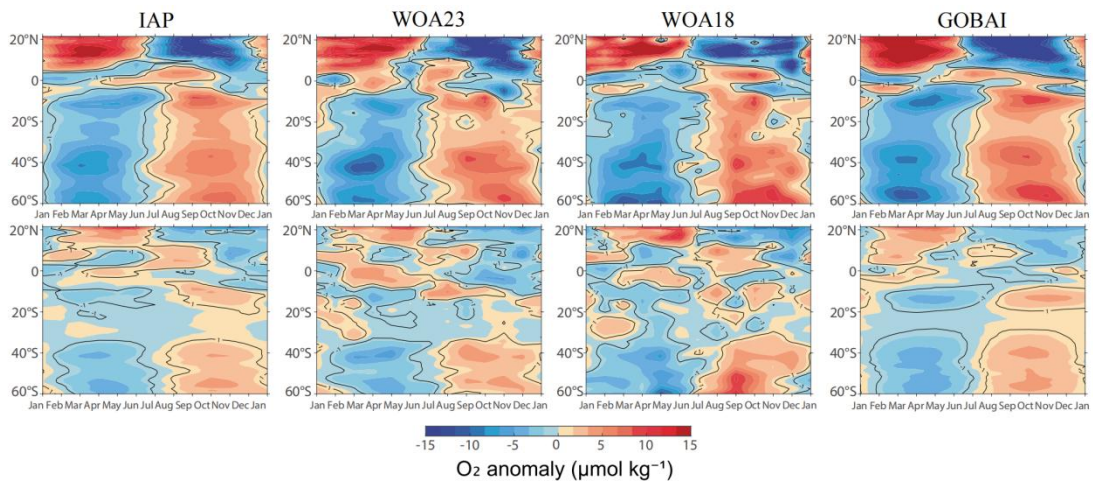

60  
61  
62  
63

**Figure S7** Zonal mean annual cycles of Indian Ocean for 0-100 m (upper) and 100-600 m (lower) for different data products (unit:  $\mu\text{mol kg}^{-1}$ ).

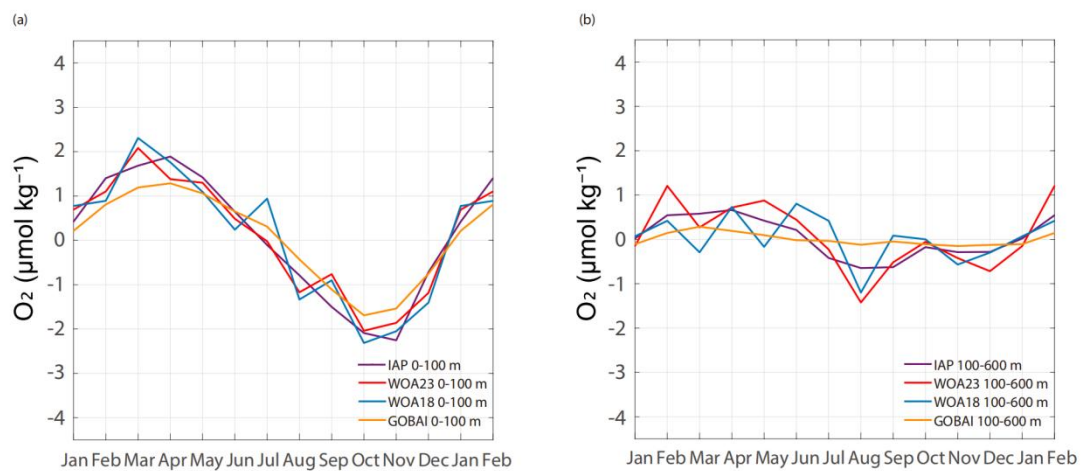

64  
65  
66

**Figure S8** Annual variation for the Pacific Ocean of the (a) 0-100 m and (b) 100-600 m mean  $\text{O}_2$  for IAP, WOA23, WOA18, and GOBAI datasets (unit:  $\mu\text{mol kg}^{-1}$ ).

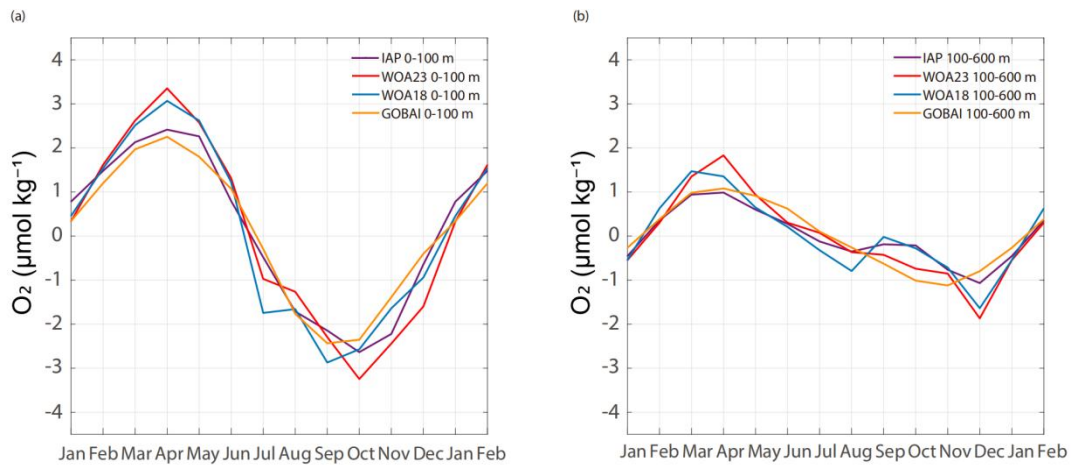

68

69 **Figure S9** Annual variation for the Atlantic Ocean of the (a) 0-100 m and (b) 100-600  
 70 m mean O<sub>2</sub> for IAP, WOA23, WOA18, and GOBAI datasets (unit:  $\mu\text{mol kg}^{-1}$ ).  
 71

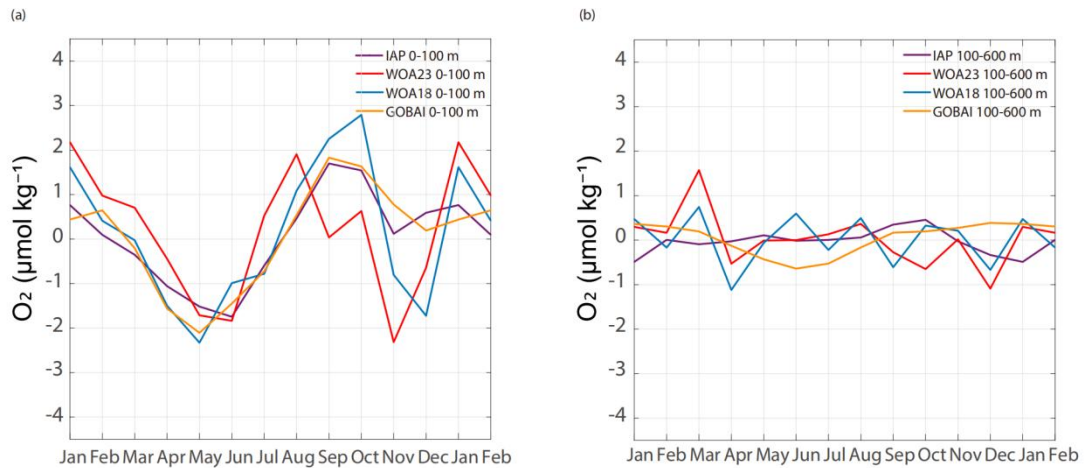

72

73 **Figure S10** Annual variation for the Indian Ocean of the (a) 0-100 m and (b) 100-600  
 74 m mean O<sub>2</sub> for IAP, WOA23, WOA18, and GOBAI datasets (unit:  $\mu\text{mol kg}^{-1}$ ).  
 75

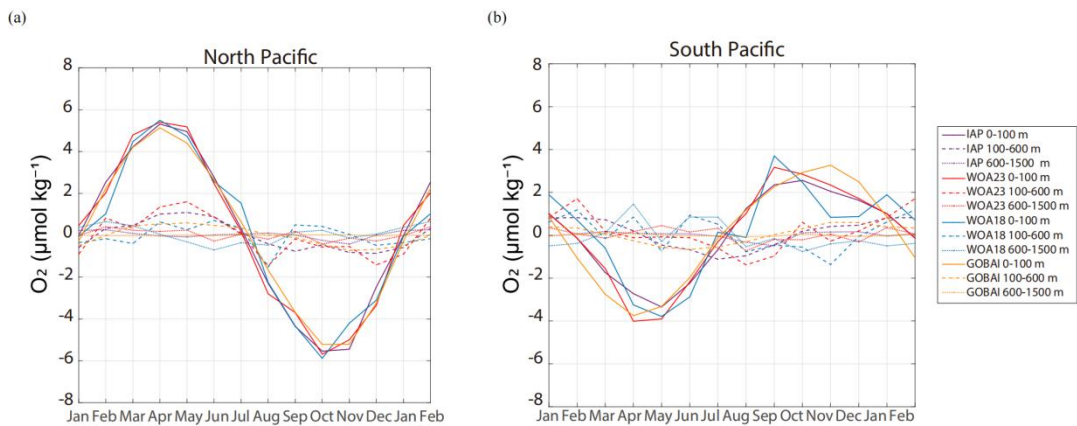

76

77 **Figure S11** Annual variation of the (a) North Pacific and (b) South Pacific mean O<sub>2</sub>  
 78 for IAP, WOA23, WOA18, and GOBAI datasets (unit:  $\mu\text{mol kg}^{-1}$ ).

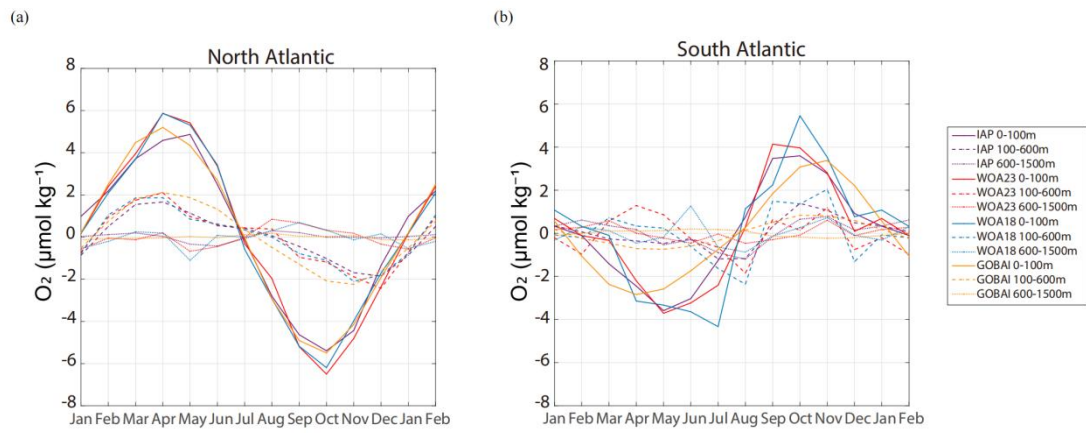

80

81 **Figure S12** Annual variation of the (a) North Atlantic and (b) South Atlantic mean  $O_2$   
 82 for IAP, WOA23, WOA18, and GOBAI datasets (unit:  $\mu\text{mol kg}^{-1}$ ).
